# Supplementary material for: A theoretical exploration of the nonradiative deactivation of hydrogen-bond complexes: isoindole–pyridine and quinoline–pyrrole
Source: Royal Society of Chemistry journal article supplement (doi:10.1039/c5ra18950k), 2015-01-01
Supplement: c5ra18950k1.pdf [file c5ra18950k1.pdf]

**A theoretical exploration on the nonradiative deactivation of hydrogen-bond complexes:  
isoindole-pyridine and quinoline-pyrrole**

Reza Omidyan, Mohammad Salehi and Gholamhassan Azimi

**This supplementary file contains two Tables:**

**Table SM1:** xyz coordinates revealed to the ground optimized geometry of monomer and dimers considered in the present study.

**Table SM2:** Vertical transition energies and configuration structures of the lowest-lying singlet electronic transitions of monomers and dimers, calculated at the CC2/aug-cc-pVDZ level of theory.

Table SM1:

| Isoindole - pyridine |          |          |          |
|----------------------|----------|----------|----------|
| C                    | 0.00000  | 1.13958  | 1.16727  |
| N                    | 0.00000  | 0.00000  | 0.40182  |
| C                    | 0.00000  | -1.13958 | 1.16727  |
| C                    | 0.00000  | -0.72841 | 2.52273  |
| C                    | 0.00000  | 0.72841  | 2.52273  |
| C                    | 0.00000  | 1.44039  | 3.75435  |
| C                    | 0.00000  | 0.71484  | 4.94603  |
| C                    | 0.00000  | -0.71484 | 4.94603  |
| C                    | 0.00000  | -1.44039 | 3.75435  |
| H                    | 0.00000  | 2.12719  | 0.71028  |
| H                    | 0.00000  | 0.00000  | -0.63322 |
| H                    | 0.00000  | -2.12719 | 0.71028  |
| H                    | 0.00000  | -2.53542 | 3.76938  |
| H                    | 0.00000  | -1.24855 | 5.90170  |
| H                    | 0.00000  | 1.24855  | 5.90170  |
| H                    | 0.00000  | 2.53542  | 3.76938  |
| N                    | 0.00000  | 0.00000  | -2.50312 |
| C                    | 1.15814  | 0.00000  | -3.20167 |
| C                    | 1.20741  | 0.00000  | -4.60575 |
| C                    | 0.00000  | 0.00000  | -5.32439 |
| C                    | -1.20741 | 0.00000  | -4.60575 |
| C                    | -1.15814 | 0.00000  | -3.20167 |
| H                    | 2.07718  | 0.00000  | -2.60707 |
| H                    | 2.17255  | 0.00000  | -5.11883 |
| H                    | 0.00000  | 0.00000  | -6.41792 |
| H                    | -2.17255 | 0.00000  | -5.11883 |
| H                    | -2.07718 | 0.00000  | -2.60707 |

  
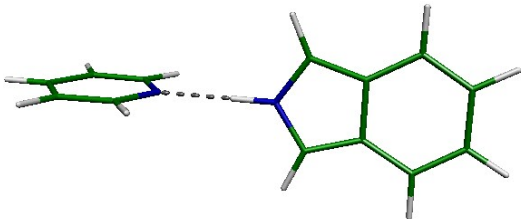

### Isoindole - pyridine

|   |          |          |          |
|---|----------|----------|----------|
| C | 1.10507  | 1.14126  | -0.00020 |
| N | 0.33825  | 0.00265  | -0.00019 |
| C | 1.10226  | -1.13786 | -0.00023 |
| C | 2.45824  | -0.72837 | -0.00015 |
| C | 2.46004  | 0.72842  | -0.00014 |
| C | 3.69251  | 1.43889  | 0.00002  |
| C | 4.88326  | 0.71183  | 0.00020  |
| C | 4.88148  | -0.71783 | 0.00019  |
| C | 3.68894  | -1.44193 | 0.00002  |
| H | 0.64959  | 2.12957  | -0.00027 |
| H | -0.69682 | 0.00387  | -0.00013 |
| H | 0.64420  | -2.12498 | -0.00034 |
| H | 3.70228  | -2.53699 | 0.00001  |
| H | 5.83661  | -1.25254 | 0.00032  |
| H | 5.83968  | 1.24423  | 0.00034  |
| H | 3.70867  | 2.53391  | 0.00001  |
| N | -2.56653 | 0.00264  | -0.00004 |
| C | -3.26512 | 0.00124  | -1.15812 |
| C | -4.66920 | -0.00141 | -1.20731 |
| C | -5.38778 | -0.00274 | 0.00011  |
| C | -4.66907 | -0.00139 | 1.20746  |
| C | -3.26500 | 0.00126  | 1.15813  |
| H | -2.67058 | 0.00239  | -2.07721 |
| H | -5.18229 | -0.00239 | -2.17246 |
| H | -6.48131 | -0.00477 | 0.00017  |
| H | -5.18206 | -0.00236 | 2.17266  |
| H | -2.67036 | 0.00242  | 2.07715  |

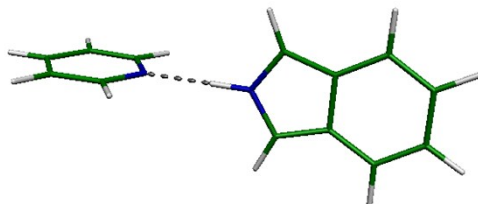

### Isoindole

|   |          |         |          |
|---|----------|---------|----------|
| C | -1.44148 | 0.00000 | 0.91975  |
| C | -0.71514 | 0.00000 | 2.10942  |
| C | 0.71514  | 0.00000 | 2.10942  |
| C | 1.44148  | 0.00000 | 0.91975  |
| C | -0.72767 | 0.00000 | -0.31170 |
| C | 0.72767  | 0.00000 | -0.31170 |
| C | -1.14508 | 0.00000 | -1.66353 |
| N | 0.00000  | 0.00000 | -2.42470 |
| C | 1.14508  | 0.00000 | -1.66353 |
| H | -2.53614 | 0.00000 | 0.93406  |
| H | -1.24808 | 0.00000 | 3.06525  |
| H | 1.24808  | 0.00000 | 3.06525  |
| H | 2.53614  | 0.00000 | 0.93406  |
| H | -2.13166 | 0.00000 | -2.12115 |
| H | 2.13166  | 0.00000 | -2.12115 |
| H | 0.00000  | 0.00000 | -3.43953 |

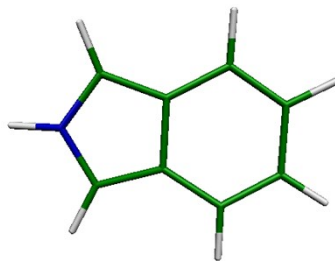

### Quinoline - pyrrole

|   |          |          |          |
|---|----------|----------|----------|
| N | 0.31045  | 1.34459  | 0.00000  |
| C | 0.89450  | 2.54557  | 0.00000  |
| C | 1.12196  | 0.23033  | 0.00000  |
| C | 2.30294  | 2.74450  | 0.00000  |
| C | 3.13804  | 1.63488  | 0.00000  |
| C | 2.55990  | 0.33300  | 0.00000  |
| H | 2.70706  | 3.76034  | 0.00000  |
| H | 0.21983  | 3.40880  | 0.00000  |
| H | 4.22771  | 1.74425  | 0.00000  |
| C | 0.51132  | -1.05960 | 0.00000  |
| C | 1.30585  | -2.20262 | 0.00000  |
| C | 2.72662  | -2.10247 | 0.00000  |
| C | 3.34725  | -0.85734 | 0.00000  |
| H | 4.43906  | -0.77418 | 0.00000  |
| H | 3.33329  | -3.01298 | 0.00000  |
| H | 0.83159  | -3.18818 | 0.00000  |
| H | -0.57994 | -1.12917 | 0.00000  |
| C | -3.06763 | -0.10458 | 1.12827  |
| C | -4.09988 | -0.95640 | 0.71455  |
| C | -4.09988 | -0.95640 | -0.71455 |
| C | -3.06763 | -0.10458 | -1.12827 |
| N | -2.46931 | 0.41156  | 0.00000  |
| H | -2.72564 | 0.17439  | 2.12318  |
| H | -4.77469 | -1.50379 | 1.37167  |
| H | -4.77469 | -1.50379 | -1.37167 |
| H | -2.72564 | 0.17439  | -2.12318 |
| H | -1.59245 | 0.94948  | 0.00000  |

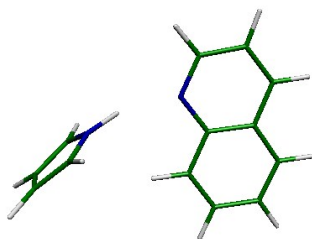

### Quinoline - pyrrole

|   |          |          |          |
|---|----------|----------|----------|
| N | 0.24420  | 1.31868  | 0.00110  |
| C | 0.82893  | 2.51932  | 0.00104  |
| C | 1.05514  | 0.20398  | 0.00026  |
| C | 2.23748  | 2.71748  | 0.00011  |
| C | 3.07198  | 1.60741  | -0.00079 |
| C | 2.49312  | 0.30585  | -0.00080 |
| H | 2.64213  | 3.73311  | 0.00013  |
| H | 0.15475  | 3.38294  | 0.00182  |
| H | 4.16170  | 1.71618  | -0.00142 |
| C | 0.44377  | -1.08560 | 0.00036  |
| C | 1.23766  | -2.22907 | -0.00059 |
| C | 2.65849  | -2.12974 | -0.00166 |
| C | 3.27980  | -0.88494 | -0.00172 |
| H | 4.37166  | -0.80237 | -0.00244 |
| H | 3.26464  | -3.04059 | -0.00248 |
| H | 0.76281  | -3.21434 | -0.00050 |
| H | -0.64752 | -1.15465 | 0.00119  |
| C | -3.13448 | -0.13009 | 1.12907  |
| C | -4.16623 | -0.98225 | 0.71475  |
| C | -4.16551 | -0.98214 | -0.71433 |
| C | -3.13346 | -0.12977 | -1.12747 |
| N | -2.53594 | 0.38654  | 0.00114  |
| H | -2.79304 | 0.14879  | 2.12419  |
| H | -4.84118 | -1.52984 | 1.37157  |
| H | -4.83965 | -1.52982 | -1.37191 |
| H | -2.79119 | 0.14952  | -2.12219 |
| H | -1.65906 | 0.92440  | 0.00156  |

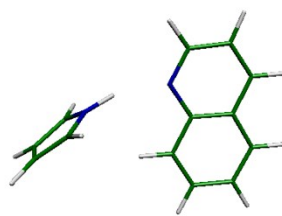

|   | <b>Quinoline</b> | <b>aug-cc-pVDZ</b> |         |
|---|------------------|--------------------|---------|
| C | -0.77722         | -1.75064           | 0.00000 |
| C | 0.42214          | -2.45673           | 0.00000 |
| C | 1.66747          | -1.76442           | 0.00000 |
| C | 1.70269          | -0.37343           | 0.00000 |
| C | -0.77364         | -0.32517           | 0.00000 |
| C | 0.48650          | 0.37405            | 0.00000 |
| N | -1.98688         | 0.32435            | 0.00000 |
| C | -1.96359         | 1.65908            | 0.00000 |
| C | -0.77313         | 2.44244            | 0.00000 |
| C | 0.45707          | 1.79851            | 0.00000 |
| H | -1.74573         | -2.25884           | 0.00000 |
| H | 0.41092          | -3.55069           | 0.00000 |
| H | 2.60242          | -2.33283           | 0.00000 |
| H | 2.65803          | 0.16215            | 0.00000 |
| H | -2.94051         | 2.15554            | 0.00000 |
| H | -0.84241         | 3.53393            | 0.00000 |
| H | 1.39588          | 2.36270            | 0.00000 |

**Table SM2**

| state                                                       | Energy (eV) | oscillator strengths | configuration                                                                       |
|-------------------------------------------------------------|-------------|----------------------|-------------------------------------------------------------------------------------|
| Isoindole - pyridine                                        |             |                      |                                                                                     |
| S <sub>1</sub> ( <sup>1</sup> B <sub>2</sub> ) <sub>1</sub> | 4.04        | 0.0668               | ( $\pi_1/\pi_1^*$ )72.9%<br>( $\pi_1/\pi_2^*$ )16.6%                                |
| S <sub>2</sub> ( <sup>1</sup> A <sub>2</sub> ) <sub>1</sub> | 4.17        | 0.0000               | ( $\pi_1/\sigma_1^*$ )47.0%<br>( $\pi_1/\sigma_2^*$ )18.4%                          |
| S <sub>3</sub> ( <sup>1</sup> B <sub>1</sub> ) <sub>1</sub> | 4.29        | 0.0000               | ( $\pi_1/\pi^*$ )72.1%<br>( $\pi_1/\pi_3^*$ )12.4%                                  |
| S <sub>4</sub> ( <sup>1</sup> B <sub>1</sub> ) <sub>2</sub> | 4.56        | 0.0030               | ( $\pi_1/\sigma_4^*$ )85.5%                                                         |
| S <sub>5</sub> ( <sup>1</sup> A <sub>2</sub> ) <sub>2</sub> | 4.59        | 0.0000               | ( $\pi_1/\sigma_5^*$ )63.4%<br>( $\pi_1/\sigma_2^*$ )14.8%                          |
| S <sub>6</sub> ( <sup>1</sup> A <sub>1</sub> ) <sub>1</sub> | 4.69        | 0.0005               | ( $\pi_1/\sigma_6^*$ )38.2%<br>( $\pi_2/\pi_2^*$ )25.7%                             |
| S <sub>7</sub> ( <sup>1</sup> B <sub>2</sub> ) <sub>2</sub> | 4.71        | 0.0233               | ( $\pi_1/\pi_4^*$ )43.0%<br>( $\pi_1/\sigma_7^*$ )29.1%<br>( $\pi_1/\pi_2^*$ )14.8% |
| S <sub>8</sub> ( <sup>1</sup> A <sub>1</sub> ) <sub>2</sub> | 4.80        | 0.0168               | ( $\pi_1/\sigma_6^*$ )54.3%<br>( $\pi_2/\pi_2^*$ )18.4%                             |



| state                   | Energy (eV) | oscillator strengths | configuration                                                                    |
|-------------------------|-------------|----------------------|----------------------------------------------------------------------------------|
| Isoindole               |             |                      |                                                                                  |
| S1 ( <sup>1</sup> B1) 1 | 4.15        | 0.0841               | ( $\pi_1/\pi_1^*$ )61.0%<br>( $\pi_1/\pi_2^*$ )29.7%                             |
| S2 ( <sup>1</sup> A2) 1 | 4.21        | 0.0000               | ( $\pi_1/\sigma_1^*$ )83.9%                                                      |
| S3 ( <sup>1</sup> A2) 2 | 4.74        | 0.0000               | ( $\pi_1/\sigma_2^*$ )74.0%                                                      |
| S4 ( <sup>1</sup> A1) 1 | 4.76        | 0.0020               | ( $\pi_2/\pi_1^*$ )31.1%<br>( $\pi_1/\pi_3^*$ )22.8%<br>( $\pi_2/\pi_2^*$ )20.1% |
| S5 ( <sup>1</sup> B2)1  | 4.85        | 0.0038               | ( $\pi_1/\sigma_3^*$ )88.0%                                                      |
| S6 ( <sup>1</sup> B1) 2 | 5.16        | 0.0413               | ( $\pi_1/\pi_2^*$ )60.5%<br>( $\pi_1/\pi_1^*$ )25.6%                             |
| S7 ( <sup>1</sup> B2) 2 | 5.41        | 0.0190               | ( $\pi_1/\sigma_4^*$ )84.8%                                                      |
| S8 ( <sup>1</sup> A1)2  | 6.01        | 0.7500               | ( $\pi_1/\pi_4^*$ )47.7%<br>( $\pi_2/\pi_1^*$ )23.5%                             |

| state                                           | Energy (eV) | oscillator strengths | configuration                                                      |
|-------------------------------------------------|-------------|----------------------|--------------------------------------------------------------------|
| pyridine                                        |             |                      |                                                                    |
| S <sub>1</sub> ( <sup>1</sup> B <sub>2</sub> )1 | 4.98        | 0.0046               | (n/ $\pi_1^*$ )77.5%                                               |
| S <sub>2</sub> ( <sup>1</sup> B <sub>1</sub> )1 | 5.21        | 0.0310               | (n/ $\sigma_1^*$ )86.0%                                            |
| S <sub>3</sub> ( <sup>1</sup> A <sub>2</sub> )1 | 5.24        | 0.0000               | (n $\sigma_1$ / $\pi_2^*$ )85.2%                                   |
| S <sub>4</sub> ( <sup>1</sup> A <sub>1</sub> )2 | 6.60        | 0.0144               | ( $\pi_1$ / $\pi_2^*$ )53.2%<br>( $\pi_2$ / $\pi_1^*$ )26.3%       |
| S <sub>5</sub> ( <sup>1</sup> A <sub>1</sub> )1 | 6.15        | 0.0058               | (n $\sigma_1$ / $\sigma_2^*$ )74.6%                                |
| S <sub>6</sub> ( <sup>1</sup> A <sub>2</sub> )2 | 6.61        | 0.0000               | ( $\pi_1$ / $\sigma_2^*$ )80.3%                                    |
| S <sub>7</sub> ( <sup>1</sup> B <sub>1</sub> )2 | 6.70        | 0.0256               | (n $\sigma_1$ / $\sigma_1^*$ )86.0%                                |
| S <sub>8</sub> ( <sup>1</sup> B <sub>2</sub> )2 | 7.16        | 0.0454               | ( $\pi_1$ / $\sigma_1^*$ )65.9%<br>( $\pi_2$ / $\sigma_2^*$ )19.8% |

| state                   | Energy (eV) | oscillator strengths | configuration                                                                             |
|-------------------------|-------------|----------------------|-------------------------------------------------------------------------------------------|
| Quinoline - pyrrole     |             |                      |                                                                                           |
| S1 ( <sup>1</sup> A'1)  | 4.35        | 0.0260               | ( $\pi_1/\pi_1^*$ )54.3%<br>( $\pi_2/\pi_2^*$ )22.3%                                      |
| S2 ( <sup>1</sup> A'2)  | 4.49        | 0.0268               | ( $\pi_3/\pi_1^*$ )71.3%<br>( $\pi_2/\pi_1^*$ )16.6%                                      |
| S3( <sup>1</sup> A''1)  | 4.60        | 0.0010               | ( $n_1/\pi_1^*$ )76.8%                                                                    |
| S4( <sup>1</sup> A'3)   | 4.63        | 0.0431               | ( $\pi_2/\pi_1^*$ )66.8%<br>( $\pi_3/\pi_1^*$ )17.2%                                      |
| S5( <sup>1</sup> A''2)  | 5.08        | 0.0000               | ( $\pi_3/\sigma_1^*$ )41.7%<br>( $\pi_3/\sigma_2^*$ )16.1%                                |
| S6( <sup>1</sup> A''3)  | 5.29        | 0.0000               | ( $\pi_4/\pi_1^*$ )81.0%                                                                  |
| S7( <sup>1</sup> A'4)   | 5.46        | 0.0158               | ( $\pi_3/\sigma_3^*$ )59.4%<br>( $\pi_3/\pi_2^*$ )12.8%                                   |
| S8( <sup>1</sup> A''4)  | 5.56        | 0.0113               | ( $\pi_3/\sigma_4^*$ )40.9%<br>( $\pi_3/\sigma_5^*$ )18.5%                                |
| S9( <sup>1</sup> A'5)   | 5.59        | 0.0674               | ( $\pi_3/\pi_2^*$ )52.2%<br>( $\pi_3/\pi_3^*$ )15.9%<br>( $\pi_3/\sigma_3^*$ )14.9%       |
| S10( <sup>1</sup> A''5) | 5.76        | 0.0399               | ( $\pi_3/\sigma_6^*$ )24.1%<br>( $\pi_3/\sigma_7^*$ )15.2%<br>( $\pi_3/\sigma_8^*$ )12.7% |

| state                    | Energy (eV) | oscillator strengths | configuration                                                   |
|--------------------------|-------------|----------------------|-----------------------------------------------------------------|
| Quinoline                |             |                      |                                                                 |
| S1 ( <sup>1</sup> A'1)   | 4.37        | 0.0247               | ( $\pi_1/\pi_1^*$ )57.4%<br>( $\pi_2/\pi_2^*$ )28.5%            |
| S2 ( <sup>1</sup> A''1)  | 4.44        | 0.0018               | ( $\sigma_1/\pi_1^*$ )89.7%                                     |
| S3 ( <sup>1</sup> A'2)   | 4.72        | 0.0588               | ( $\pi_2/\pi_1^*$ )87.8%                                        |
| S4 ( <sup>1</sup> A''2)  | 5.37        | 0.0000               | ( $\sigma_1/\pi_2^*$ )77.3%                                     |
| S5 ( <sup>1</sup> A''3)  | 5.81        | 0.0000               | ( $\pi_2/\sigma_1^*$ )73.5%                                     |
| S6 ( <sup>1</sup> A'3)   | 5.82        | 0.6325               | ( $\pi_2/\pi_2^*$ )28.3%<br>( $\pi_1/\pi_1^*$ )20.3%            |
| S7 ( <sup>1</sup> A'4)   | 6.07        | 0.0010               | ( $\pi_2/\pi_3^*$ )19.4%<br>( $\pi_2/\pi_4^*$ )18.8%            |
| S8 ( <sup>1</sup> A'5)   | 6.10        | 0.0142               | ( $\sigma_1/\sigma_1^*$ )59.1%<br>( $\sigma_2/\sigma_1^*$ )5.7% |
| S9 ( <sup>1</sup> A''4)  | 6.21        | 0.0021               | ( $\pi_2/\sigma_1^*$ )63.7%                                     |
| S10 ( <sup>1</sup> A''5) | 6.31        | 0.0196               | ( $\pi_1/\sigma_1^*$ )60.5%<br>( $\pi_2/\sigma_2^*$ )14.0%      |

| state                                                       | Energy (eV) | oscillator strengths | configuration                                                                    |
|-------------------------------------------------------------|-------------|----------------------|----------------------------------------------------------------------------------|
| Pyrrole                                                     |             |                      |                                                                                  |
| S <sub>1</sub> ( <sup>1</sup> A <sub>2</sub> ) <sub>1</sub> | 5.02        | 0.0000               | ( $\pi_1/\sigma_1^*$ )84.2%                                                      |
| S <sub>2</sub> ( <sup>1</sup> B <sub>2</sub> ) <sub>1</sub> | 5.74        | 0.0145               | ( $\pi_2/\sigma_1^*$ )51.6%<br>( $\pi_1/\sigma_2^*$ )33.1%                       |
| S <sub>3</sub> ( <sup>1</sup> A <sub>2</sub> ) <sub>2</sub> | 5.78        | 0.0000               | ( $\pi_1/\sigma_3^*$ )81.6%                                                      |
| S <sub>4</sub> ( <sup>1</sup> B <sub>2</sub> ) <sub>2</sub> | 5.82        | 0.0244               | ( $\pi_1/\sigma_2^*$ )56.3%<br>( $\pi_2/\sigma_1^*$ )28.9%                       |
| S <sub>5</sub> ( <sup>1</sup> B <sub>1</sub> ) <sub>1</sub> | 6.22        | 0.1934               | ( $\pi_1/\pi_1^*$ )81.7%                                                         |
| S <sub>6</sub> ( <sup>1</sup> A <sub>1</sub> ) <sub>1</sub> | 6.33        | 0.0002               | ( $\pi_2/\pi_2^*$ )26.6%<br>( $\pi_1/\pi_3^*$ )19.1%<br>( $\pi_2/\pi_1^*$ )16.6% |
| S <sub>7</sub> ( <sup>1</sup> B <sub>1</sub> ) <sub>2</sub> | 6.97        | -0.0002              | ( $\pi_1/\pi_4^*$ )62.2%<br>( $\pi_1/\pi_2^*$ )17.6%                             |
| S <sub>8</sub> ( <sup>1</sup> A <sub>1</sub> ) <sub>2</sub> | 7.40        | 0.0000               | ( $\pi_2/\pi_1^*$ )72.4%                                                         |
